# Supplementary material for: Spaceflight Promotes Biofilm Formation by Pseudomonas aeruginosa
Source: PLOS journal article supplement (doi:10.1371/journal.pone.0062437), 2013-04-29

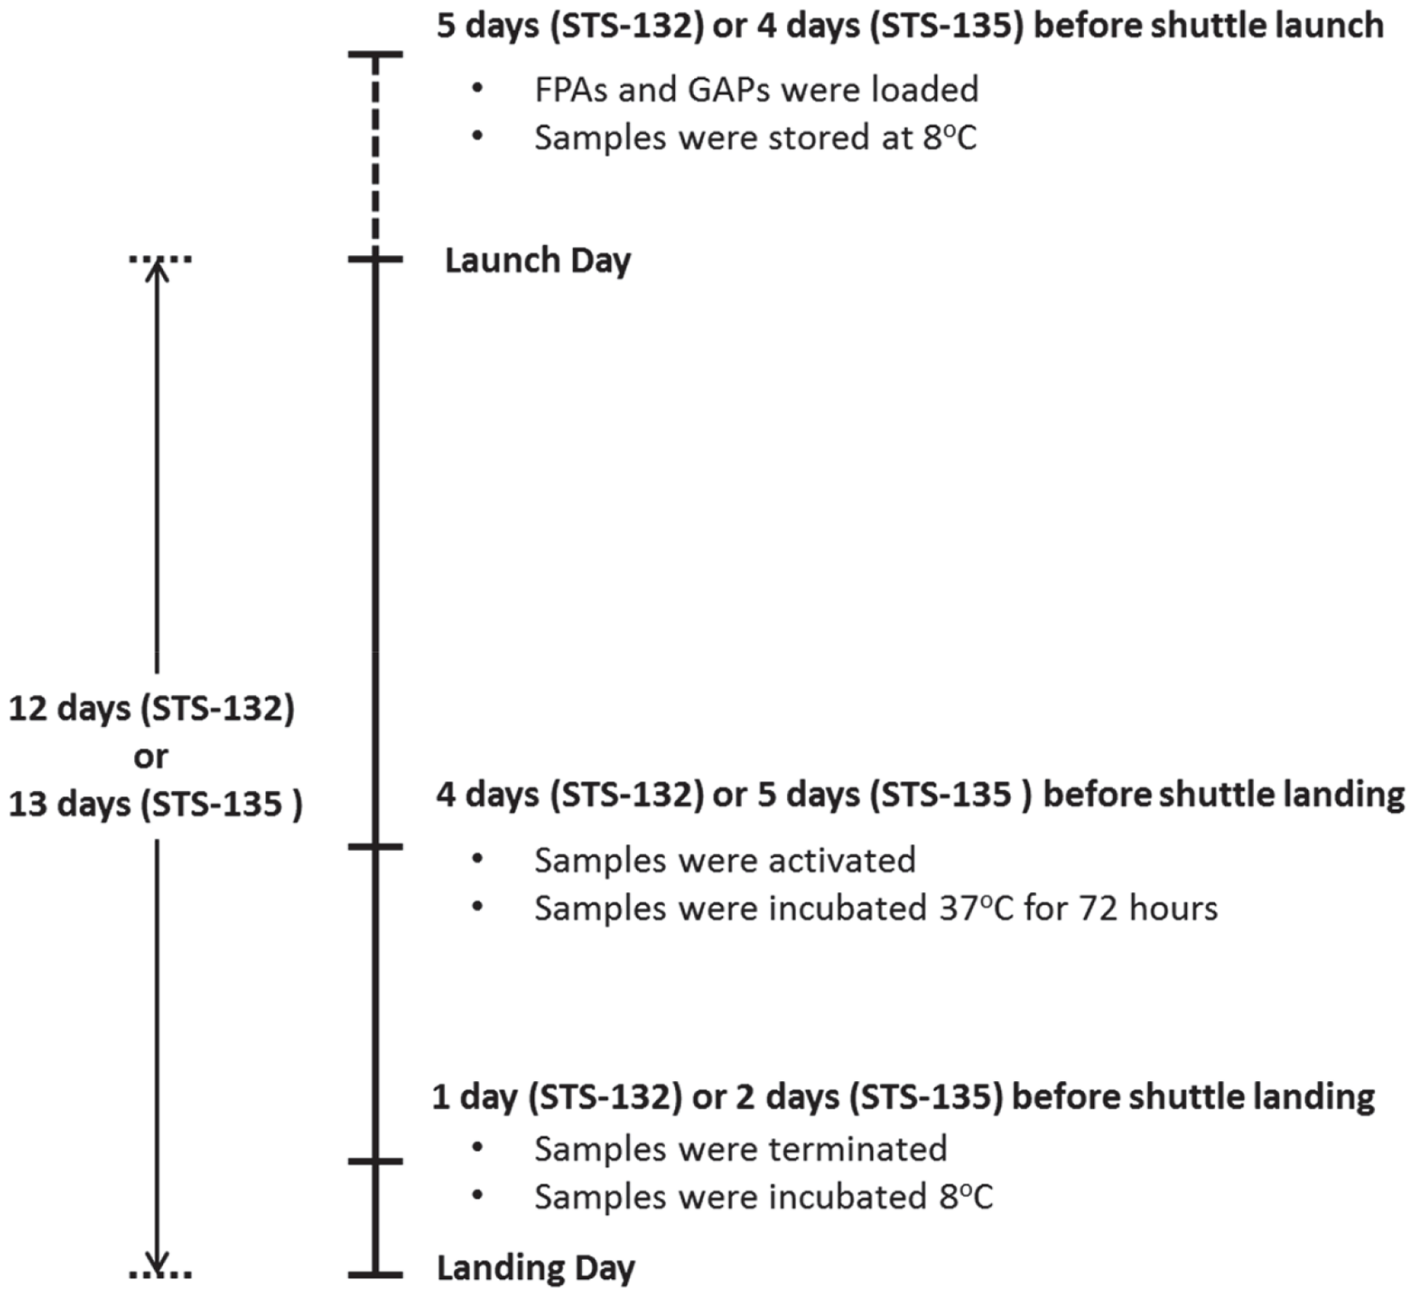

Supplement: S2 (10.1371/journal.pone.0062437.s002) [file journal.pone.0062437.s002]
