# Supplementary material for: Spaceflight Promotes Biofilm Formation by Pseudomonas aeruginosa
Source: PLOS journal article supplement (doi:10.1371/journal.pone.0062437), 2013-04-29
Supplement: S7 (10.1371/journal.pone.0062437.s007) [file journal.pone.0062437.s007]

**Table S3. Spaceflight and motility affect biofilm formation and architecture in mAUM.**

| <i>P. aeruginosa</i>   | Gravity           | Viable cells<br>(10 <sup>6</sup> CFU/mem) | Biomass<br>( $\mu\text{m}^3/\mu\text{m}^2$ ) | Mean<br>thickness<br>( $\mu\text{m}$ ) | Void<br>fraction | Structure          |
|------------------------|-------------------|-------------------------------------------|----------------------------------------------|----------------------------------------|------------------|--------------------|
| Wild type              | Normal<br>gravity | 1.0±0.4                                   | 3.2±0.5                                      | 4.7±0.8                                | 0.30±0.02        | Flat               |
|                        | Spaceflight       | 2.8±0.3                                   | 4.5±0.3                                      | 8.1±0.3                                | 0.44±0.03        | Column &<br>canopy |
| $\Delta\text{motABCD}$ | Normal<br>gravity | 0.4±0.1                                   | 3.9±0.4                                      | 5.6±0.7                                | 0.28±0.03        | Flat               |
|                        | Spaceflight       | 4.2±2.4                                   | 3.7±0.1                                      | 5.2±0.4                                | 0.28±0.05        | Flat               |

All strains were grown in FPAs with solid inserts. Biomass and mean thickness were calculated with COMSTAT software. Void fraction was calculated as described (Equation S1). Results are shown as mean ± SD; N=3.
